# Supplementary material for: Treatment outcomes of extended-field radiation therapy and the effect of concurrent chemotherapy on uterine cervical cancer with para-aortic lymph node metastasis
Source: Springer Nature journal article supplement (doi:10.1186/s13014-014-0320-5), 2015-01-12
Supplement: MOESM2 [file 9773652]

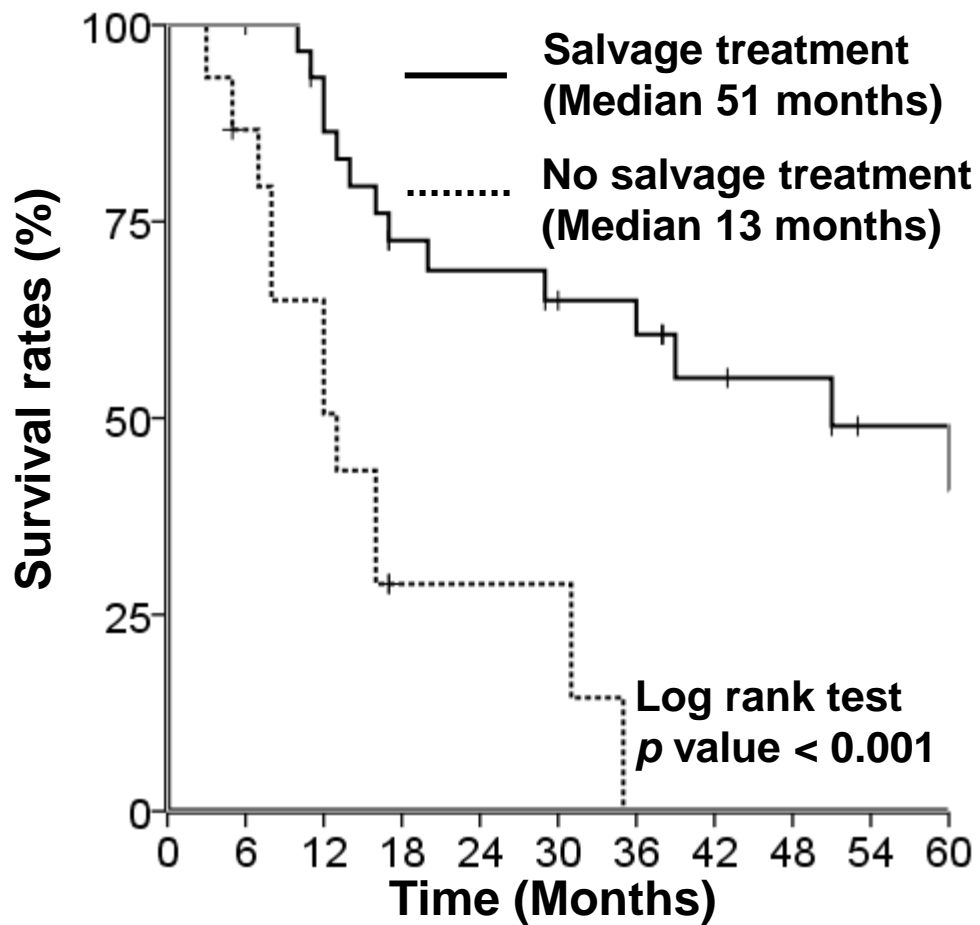

**No. at Risk**

|                      |    |    |    |    |    |    |    |    |   |   |   |
|----------------------|----|----|----|----|----|----|----|----|---|---|---|
| Salvage treatment    | 31 | 30 | 26 | 19 | 18 | 16 | 14 | 10 | 8 | 6 | 4 |
| No salvage treatment | 15 | 12 | 8  | 2  | 2  | 2  | 0  | 0  | 0 | 0 | 0 |
